# 1 **Deletion of *TRPC6*, an autism risk gene, induces hyperexcitability in cortical** 2 **neurons derived from human pluripotent stem cells**

3 **Kyung Chul Shin<sup>1\*</sup>, Gowher Ali<sup>1\*</sup>, Houda Yasmine Ali Moussa<sup>1</sup>, Vijay Gupta<sup>1</sup>, Alberto de la Fuente<sup>1</sup>,**  
4 **Hyung-Goo Kim<sup>1</sup>, Lawrence W Stanton<sup>1,2†</sup>, Yongsoo Park<sup>1,2†</sup>**

5 <sup>1</sup>Neurological Disorders Research Center, Qatar Biomedical Research Institute (QBRI), Hamad Bin Khalifa  
6 University (HBKU), Qatar Foundation, Doha, Qatar

7 <sup>2</sup>College of Health & Life Sciences (CHLS), Hamad Bin Khalifa University (HBKU), Qatar Foundation, Doha,  
8 Qatar

9  
10 \*These authors contributed equally to this work.

11 †Corresponding authors;

12 Dr. Yongsoo Park, Neurological Disorders Research Center, Qatar Biomedical Research Institute (QBRI), Hamad  
13 Bin Khalifa University (HBKU), Qatar Foundation, Doha, Qatar

14 E-mail: [ypark@hbku.edu.qa](mailto:ypark@hbku.edu.qa)

15  
16 Dr. Lawrence W Stanton, Neurological Disorders Research Center, Qatar Biomedical Research Institute (QBRI),  
17 Hamad Bin Khalifa University (HBKU), Qatar Foundation, Doha, Qatar

18 E-mail: [LStanton@hbku.edu.qa](mailto:LStanton@hbku.edu.qa)

19  
20  
21  
22 **Competing Interests:** The authors declare no competing interests.

## 23 **Acknowledgements**

24 We thank Dr. Volker Busskamp for generous gift of the CRDT5 cell line. We thank Dr. Shahryar Khattak, Dr.  
25 Khaled Machaca and Dr. Raphael Courjaret for technical support. Thanks to Dr. Khalid Ouararhni for RNA-Seq.  
26 This work was supported by the grant from Qatar Biomedical Research Institute (Project Number SF 2019 004  
27 to Y.P.).  
28  
29

## 30 **Author Contributions**

31 Conceptualization: K.C.S., L.W.S., Y.P.; methodology and investigation: K.C.S., G.A., V.G., A.F., H.Y.A.M.;  
32 visualization: K.C.S., G.A., V.G., A.F., Y.P.; project administration and funding acquisition: L.W.S., Y.P.;  
33 supervision: H.G.K., L.W.S., Y.P.; writing - original draft: K.C.S., L.W.S., Y.P.

34

35 **ABSTRACT**

36 Autism spectrum disorder (ASD) is a complex and heterogeneous neurodevelopmental disorder linked to  
37 numerous rare, inherited and arising *de novo* genetic variants. ASD often co-occurs with attention-deficit  
38 hyperactivity disorder and epilepsy, which are associated with hyperexcitability of neurons. However, the  
39 physiological and molecular mechanisms underlying hyperexcitability in ASD remain poorly understood.  
40 Transient receptor potential canonical-6 (TRPC6) is a Ca<sup>2+</sup>-permeable cation channel that regulates store-operated  
41 calcium entry (SOCE) and is a candidate risk gene for ASD. Using human pluripotent stem cell (hPSC)-derived  
42 cortical neurons, single cell calcium imaging, and electrophysiological recording, we show that TRPC6 knockout  
43 (KO) reduces SOCE signaling and leads to hyperexcitability of neurons by increasing action potential frequency  
44 and network burst frequency. Our data provide evidence that reduction of SOCE by TRPC6 KO results in neuronal  
45 hyperexcitability, which we hypothesize is an important contributor to the cellular pathophysiology underlying  
46 hyperactivity in some ASD.

47

## 48 Introduction

49

50 Autism spectrum disorder (ASD) is a complex neurodevelopmental disorder, characterized by stereotyped  
51 repetitive behaviors and communication deficits<sup>1</sup>. An increasing numbers of genetic variants implicated in ASD  
52 have been reported, suggesting a high degree of locus heterogeneity and a contribution from rare and *de novo*  
53 variants<sup>2</sup>. Comorbidity is common in ASD, including attention-deficit hyperactivity disorder (ADHD) and  
54 epilepsy, which are associated with hyperexcitability of neurons<sup>3</sup>. ASD is phenotypically and etiologically so  
55 heterogeneous that it is challenging to determine a contributing role of various variants on ASD etiology and to  
56 uncover the underlying cellular and molecular pathophysiology. The functional study of genetic variants  
57 associated with ASD is critical for the elucidation of ASD pathophysiology, thereby moving from gene discovery  
58 to understanding the biological influences of genetic variants for the development of ASD therapeutics<sup>4</sup>.

59 Risk variants associated with ASD converge on common cellular signaling and molecular pathways in neurons<sup>5</sup>.  
60 Intracellular calcium signaling is dysregulated in ASD and risk variants of ASD may cause deleterious effects on  
61 calcium signaling of the endoplasmic reticulum (ER), a major calcium store<sup>6</sup>. However, it remains poorly  
62 understood how calcium dysregulation gives rise to the pathophysiology of ASD and the hyperexcitability  
63 phenotype of ASD.

64 Calcium ions (Ca<sup>2+</sup>) are second messengers that control diverse biological processes, including both short-term  
65 response on neurotransmission and long-term effects on gene expression and neuronal differentiation<sup>7, 8, 9</sup>. Store-  
66 operated Ca<sup>2+</sup> entry (SOCE) is the process by which the emptying of ER calcium stores causes influx of calcium<sup>10</sup>  
67 and maintains calcium homeostasis through the connection of the ER/plasma membrane<sup>11</sup>. SOCE regulates  
68 neuronal signaling required for the maintenance of spines, neuronal excitability, and gene transcription<sup>12</sup>. SOCE  
69 is mainly mediated by ORAI, a calcium channel in the plasma membrane, and STIM (stromal interaction  
70 molecules), an ER calcium sensor<sup>13, 14, 15, 16</sup>. Dysregulation of SOCE is linked to neurological disorders such as  
71 Alzheimer's disease, Huntington's disease, and Parkinson's disease<sup>12, 17</sup>.

72 Transient receptor potential canonical (TRPC) channels are a family of Ca<sup>2+</sup>-permeable cation channels that  
73 regulates SOCE by modulating STIM1 activity and the ternary complex of STIM1–ORAI1–TRPC<sup>18</sup>. TRPC6 is  
74 a candidate risk factor for ASD and implicated in ASD etiology: *de novo* missense and nonsense mutations in  
75 TRPC6 associated with ASD etiology have been reported<sup>19, 20, 21</sup>. Loss-of-function mutations in TRPC6 reduce  
76 calcium influx in human pluripotent stem cell (hPSC)-derived neurons<sup>19</sup> and TRPC6 knockdown (KD) in  
77 *Drosophila* causes autism-like behavioral deficits and leads to a hyperactivity phenotype<sup>21</sup>. However, the  
78 pathophysiology underlying hyperactivity phenotype caused by TRPC6 KD in ASD is unclear.

79 A major impediment to ASD research is the lack of relevant animal and cellular models. Reprogramming somatic  
80 cells to a pluripotent state enables the development of neuronal models to study human diseases<sup>22</sup>. Patient-specific  
81 hPSC-derived neurons recapitulate the genomic, molecular and cellular attributes of developing native human  
82 neuronal subtypes with advantages over single time point studies. TRPC6 knockout (KO) hPSC lines were  
83 generated using CRISPR/Cas9 genome-editing techniques. We validated that hPSC-derived cortical neurons are  
84 functionally active. TRPC6 KO reduced SOCE calcium signaling and caused hyperexcitability of neurons by  
85 increasing network burst frequency and action potential frequency. Taken together, our data unveil the molecular  
86 and cellular pathophysiology underlying hyperactivity of ASD individuals. TRPC6 KO hPSC-derived cortical  
87 neurons reproduce an ASD hyperexcitability phenotype and thus provide a platform to model ASD  
88 neuropathology and pave the way for further studies to discover therapeutics for intervention of ASD.

## 90 Results

### 92 Generation of TRPC6 KO hPSC-derived cortical neurons

93 TRPC6 mutations in ASD individuals are genetic risk factors for ASD<sup>19,20,21</sup> and TRPC6 KD causes the autism-  
94 like hyperactivity behavior in *Drosophila*<sup>21</sup>. To study the pathophysiology of ASD in a human neuron-based  
95 model, we generated TRPC6 KO hPSC lines by CRISPR-Cas9 gene editing (**Supplementary Fig. 1**). The guide  
96 RNA was designed to target the genomic sequence of TRPC6 exon 1, upstream of translation start site  
97 (**Supplementary Fig. 1a**). Two TRPC6 KO clones, termed C21 and C47, were established, where 65 bp and 49  
98 bp were deleted, respectively including the region of the start codon (**Supplementary Fig. 1b-d**). The TRPC6  
99 KO hPSCs showed normal morphology similarly with wild-type control hPSCs (**Supplementary Fig. 2a**) and  
100 expressed pluripotency markers including OCT4, NANOG, and SOX2 in monolayer cultured on Matrigel in  
101 mTesR1 medium (**Supplementary Fig. 2b**).

102 For neuronal differentiation, we utilized and modified previously described methods<sup>23</sup> that creates functional  
103 cortical neurons with greater than 90% efficiency (**Fig. 1a,b**). We established the protocol for differentiation of  
104 hPSCs to mature human cortical neurons (**Fig. 1b**). Wild-type (CRTD5) hPSC lines were differentiated to neural  
105 progenitor cells (NPCs) (Week 0), and then NPCs further differentiated to cortical neurons up to 8 weeks (**Fig.**  
106 **1b**). NPCs generated self-organizing rosette structures that expressed sex-determining region Y-related HMG box  
107 2 (SOX2), a marker for neural stem cells and neural progenitors as well as telencephalic markers FOXG1 and  
108 OTX2, suggesting efficient neural conversion (**Supplementary Fig. 2c**).

109 Human cortical neurons after 8 weeks of differentiation were immunostained using antibodies against cortical  
110 neuron markers. Neurons expressed microtubule associated protein-2 (MAP2, a pan-neuronal marker) together  
111 with cortical upper layer markers such as CTIP2/BCL11B, special AT-rich sequence-binding protein 2 (SATB2),  
112 and POU domain, class 3, transcription factor 2 (POU3F2, also known as BRN2) as well as T-box brain protein  
113 2 (TBR2, a cortical deep layer marker), showing the efficient differentiation of cortical neurons with  
114 characteristics of both upper and deep cortical layers (**Fig. 1b**). Given the low number of cells expressing glial  
115 fibrillary acidic protein (GFAP), a marker for astrocytes, with beta tubulin III (BTUB, a neuron marker) at 8  
116 weeks of differentiation from NPCs, we estimated the efficiency of neuronal differentiation was >90% (**Fig. 1c**).  
117 Vesicular glutamate transporter 1 (vGLUT1, a marker for glutamatergic excitatory synapses) and synaptophysin  
118 (Syn, a synaptic vesicle protein) were colocalized with MAP2 (**Fig. 1c,d**). Two independent clones of hPSCs  
119 carrying the deletion of TRPC6 (TRPC6 KO C21 and C47) were independently differentiated to cortical neurons.  
120 Loss of TRPC6 protein expression was confirmed by Western blot (**Fig. 1e**). TRPC6 KO and control hPSC-

121 derived cortical neurons at 8 weeks post-differentiation did not show any significant differences in the expression  
122 levels of cortical neuron marker proteins (**Fig. 1b**).

### 124 **Functional characterization of hPSC-derived cortical neurons**

125 Next, we validated the functional maturation of hPSC-derived cortical neurons using the whole-cell patch-clamp  
126 technique (**Fig. 2a-d**). Generation of action potential (AP) is the hallmark of neuronal differentiation and maturity  
127 of neurons given that presynaptic neurons generate and transmit AP to communicate with the postsynaptic  
128 neurons. AP was monitored in the current-clamp mode (**Fig. 2b**) and distributions of AP generation were analyzed.  
129 The frequency of “no AP”, “single AP”, or “multiple AP” was assessed in hPSC-derived cortical neurons at 0, 3,  
130 6, or 8 weeks of differentiation (**Fig. 2c**). Cortical neurons differentiated for 6 and 8 weeks generated multiple  
131 and repetitive action potentials: ~70% multiple AP and ~30% single AP (**Fig. 2c**), whereas NPCs (0 week post-  
132 differentiation) had no multiple AP. Typical Na<sup>+</sup> influx followed by K<sup>+</sup> efflux upon membrane depolarization was  
133 observed in a voltage clamp mode from hPSC-derived cortical neurons after 6 weeks of differentiation (**Fig. 2d**,  
134 **Supplementary Fig. 3**).

135 We further examined functional activity of hPSC-derived cortical neurons using single-cell calcium imaging with  
136 a Fura-2 ratiometric calcium indicator (**Fig. 2e-j**). Neurons express voltage-gated calcium channels (VGCCs) that  
137 mediate calcium influx to trigger vesicle fusion and neurotransmitter release. Activity of VGCCs is a useful  
138 benchmark of neuronal differentiation and maturity of hPSC-derived cortical neurons. Upon applying 50 mM  
139 KCl to depolarize the membrane potential and specifically activate VGCCs, we analyzed calcium influx through  
140 VGCCs (**Fig. 2e,f**). Most cortical neurons (> 90%) after 6 and 8 weeks of differentiation evoked calcium influx  
141 upon 50 mM KCl stimulation (**Fig. 2g**) confirming that the efficiency of neuronal differentiation reaches  
142 90~100% (**Fig. 1b**). Net increase of calcium influx in a single neuron showed no differences between 3, 6, and 8  
143 weeks of differentiation (**Fig. 2h**), however the percentage of neurons responding to KCl stimulation increased  
144 as cortical neurons matured (**Fig. 2g**). As a control, buffer without extracellular calcium ions (0 Ca<sup>2+</sup>) caused no  
145 calcium influx, and nifedipine, a L-type VGCC blocker, dramatically inhibited calcium influx (**Fig. 2i,j**),  
146 correlating with the prominent L-type VGCC in primary cortical neurons<sup>24,25</sup>. Altogether, hPSC-derived cortical  
147 neurons after 6 and 8 weeks of differentiation were functionally active, whereas 3 week-old cortical neurons were  
148 relatively immature based on low percentages of neurons that generated multiple AP and responded to KCl  
149 stimulation (**Fig. 2c,g**).

### 151 **SOCE calcium signaling in mature hPSC-derived cortical neurons**

SOCE modulates neuronal signaling and is associated with neurological diseases<sup>7, 8, 9 12, 17</sup>. However, it remains controversial whether SOCE is active in primary neurons as recording SOCE in primary neurons is challenging due to intrinsic limitations<sup>26</sup>. We took advantage of hPSC-derived cortical neurons to monitor SOCE activity as neurons develop *in vitro*. Thapsigargin (TG), a SERCA pump inhibitor, depletes ER calcium stores and leads to activation of SOCE (**Fig. 3a**). TG-induced SOCE was weak in NPCs (0 week post-differentiation) but significantly strengthened as hPSC-derived cortical neurons matured over 8 weeks of differentiation (**Fig. 3b**). As a positive control of single-cell calcium imaging, ionomycin, a calcium ionophore, was applied to induce calcium influx in the presence of 2 mM CaCl<sub>2</sub>. Ionomycin caused consistent calcium influx, confirming the reliability and reproducibility of our calcium imaging experiments (**Fig. 3c,d**).

Next, we tested SOCE using a pharmacological inhibitor, BTP2, a selective TRPC channel blocker without subtype selectivity<sup>27,28</sup>. BTP2 treatment strongly inhibited SOCE in 8-week old hPSC-derived cortical neurons, comparable to gadolinium (Gd<sup>3+</sup>), a non-selective cation channel blocker<sup>29</sup> (**Fig. 3e,f**). Both BTP2 and gadolinium had no effect on ionomycin-induced calcium influx (**Fig. 3g,h**), indicating that TRPC channels are linked to SOCE.

TRPC6 is involved in SOCE<sup>18</sup> and human TRPC6 is expressed throughout the CNS and peripheral tissues<sup>30</sup>. We observed TRPC6 expression in hPSC-derived cortical neurons during neuronal differentiation (**Fig. 3i**). To validate that TRPC6 regulates SOCE, we tested SOCE in TRPC6 KO hPSC-derived cortical neurons (C21 hPSC line) (**Fig. 3j-l**). Indeed, TRPC6 KO reduced SOCE in cortical neurons at 3 (**Fig. 3j**), 6 (**Fig. 3k**), and 8 weeks (**Fig. 3l**) of differentiation. We confirmed the inhibition of SOCE by TRPC6 KO using different hPSC line (C47)(**Supplementary Fig. 4a**). Altogether, our data support that SOCE is impaired in TRPC6 KO neurons, which recapitulate ASD pathology.

### Hyperexcitability in TRPC6 KO hPSC-derived cortical neurons

Next, we performed whole-cell patch-clamping to analyze neuronal activity in TRPC6 KO cortical neurons, where SOCE is reduced. Intriguingly, TRPC6 KO increased the frequency of AP generation in hPSC-derived cortical neurons (C21 hPSC line) differentiated for 6 weeks (**Fig. 4a-d**) and 8 weeks (**Fig. 4e,f**). All TRPC6 KO neurons produced multiple AP, whereas approximately 30% and 20% of wild-type cortical neurons generated single AP in week 6-old and week 8-old neurons, respectively (**Fig. 4c,e**). This increase of AP frequency was confirmed in different hPSC line (C47)-derived TRPC6 KO cortical neurons (**Supplementary Fig. 4b-d**).

We further tested neuronal activity and neural network in TRPC6 KO hPSC-derived cortical neurons using micro-electrode array (MEA). MEA contains a grid of 16 tightly spaced electrodes embedded in the culture surface seeded with hPSC-derived cortical neurons (**Fig. 4g**). MEA simultaneously monitors neuronal activity from



184 different locations across the cultured cortical neurons to detect propagation and synchronization of neural  
185 activity, thus measuring both the neuronal activity and neural network formation. As a control, we confirmed that  
186 tetrodotoxin (TTX), a selective voltage-gated sodium channel blocker inhibiting AP generation, completely  
187 blocked weighted mean firing rate and synchrony, which were rescued by washout (**Supplementary Fig. 5**). In  
188 addition, amino-phosphonopentanoate (AP5), a selective NMDA receptor antagonist, inhibited not only weighted  
189 mean firing rate, but also synchrony and network bursts frequency (**Fig. 4g-j**), indicating that synaptic  
190 transmission and neural networking in hPSC-derived cortical neurons are mainly mediated by glutamatergic  
191 excitatory synapses. Correlating with AP generation (**Fig. 4a-f**), TRPC6 KO led to an increase of weighted mean  
192 firing rate and synchrony in hPSC-derived cortical neurons at 6 and 8 weeks of differentiation (**Fig. 4m-p**),  
193 however TRPC6 KO had little effect on neuronal activity of 3-week old immature cortical neurons (**Fig. 4k,l**).  
194 Taken together, electrophysiological data show that TRPC6 KO hPSC-derived cortical neurons have  
195 hyperexcitability of neuronal activity and neural network.

### 197 **Transcriptome profiling of TRPC6 KO hPSC-derived cortical neurons**

198 To gain insight to the molecular basis of the changes in electrophysiological activity, we applied whole  
199 transcriptome RNA-Seq analysis to characterize gene expression differences in cortical neurons derived from  
200 control and TRPC6 KO hPSC at 8 weeks of differentiation. RNA-Seq was performed on four independent  
201 differentiation experiments; biological replicates of control and TRPC6 KO hPSC-derived cortical neurons  
202 differentiated from two different TRPC6 KO hPSC clones (C21 and C47). We categorized upregulated and  
203 downregulated genes with at least 1.5 fold change (FC) and  $< 0.05$  *p*-value cut-off: 362 upregulated and 132  
204 downregulated transcripts were identified (**Fig. 5a, Supplementary Table 1**). The hierarchical clustering based  
205 on differentially expressed RNA transcripts revealed clear clustering of four biological replicates in each  
206 condition (**Fig. 5b**). Gene ontology (GO) enrichment analysis revealed that the most significantly upregulated  
207 biological processes in TRPC6 KO hPSC-derived cortical neurons include ‘chemical synaptic transmission’,  
208 ‘trans-synaptic signaling’, and ‘synapse organization’ (**Fig. 5c**); note that no biological processes significantly  
209 downregulated were observed. We further applied KEGG pathway analysis, showing the upregulation of  
210 ‘glutamate signaling’, ‘calcium signaling’, and ‘neurotransmitter receptor activity’ (**Supplementary Fig. 6**).  
211 vGLUT1 mRNA was upregulated, whereas vesicular GABA transporter (VGAT) mRNA was downregulated  
212 (**Supplementary Fig. 6a,b**). Furthermore, mRNA levels of calcium signaling pathways, presynaptic proteins,  
213 glutamate ionotropic receptor kainate type subunit 1 (GRIK1), and glutamate metabotropic receptor (GRM1)  
214 were significantly elevated in TRPC6 KO hPSC-derived cortical neurons (**Supplementary Fig. 6a,c,d and**  
215 **Supplementary Table 1**), thereby leading to the hyperactivity of TRPC6 KO neurons. Altogether, our

216 transcriptomic analyses support the hyperactivity of TRPC6 KO hPSC-derived cortical neurons by upregulating  
217 glutamate excitatory synapses and calcium signaling pathways.

218

## Discussion

Neurological and psychiatric disorders are often caused by dysregulation of synaptic transmission and neural networks. Given that the access to the human brain is almost impossible, studying human neural networks in disease conditions is challenging due to the absence of good model system. Most studies have used various animal models that have limitation to reproduce human brain development and human neurophysiology. Patient-specific hPSC-derived neurons with human genetic and epigenetic backgrounds recapitulate the genomic, molecular and cellular properties of native human neurons thereby offering a human cell-based model to investigate the pathophysiology. We have exploited this model system to demonstrate that TRPC6 KO hPSC-derived cortical neurons reproduce hyperexcitability of ASD phenotype and study key aspects of ASD pathology.

ASD is a highly heterogeneous neurodevelopmental disorder. ADHD and hyperactivity are common comorbidities of ASD: >50% ASD individuals have ADHD<sup>31, 32</sup>. Due to the complexity, it remains challenging to unveil the pathophysiological and molecular mechanisms underlying this hyperactivity and hyperexcitability of neurons in ASD. Using TRPC6 KO hPSC-derived cortical neurons we can reproduce hyperexcitability of ASD phenotype. TRPC6 KO reduces SOCE in cortical neurons after 3 to 8 weeks of differentiation (**Fig. 3j-l**). Hyperexcitability is only observable in mature TRPC6 KO cortical neurons differentiated for 6 to 8 weeks (**Fig. 4a-p**), not in 3-week old immature cortical neurons (**Fig. 4k,l**). RNA-Seq analysis further validates upregulation of excitatory synapses and downregulation of inhibitory GABA transporter (VGAT), implying imbalance of synaptic connections and networks that may result in hyperexcitability of TRPC6 KO hPSC-derived cortical neurons (**Fig. 5**).

Our data provide evidence that reduction of SOCE by TRPC6 KO might result in hyperexcitability of mature cortical neurons (**Fig. 4m-p**). TRPC6 loss-of-function mutations in *Drosophila* cause ASD-like behavior including hyperactivity<sup>21</sup>, suggesting that our TRPC6 KO hPSC-derived cortical neurons can be a good model to understand hyperactive behavior of ASD at a cellular and molecular level. These hyperactive hPSC-derived cortical neurons will be used for better care of ASD by taking a personalized medicine approach. Every ASD individuals show different and heterogeneous pathophysiology. We can apply different therapeutics depending on different pathology of hPSC-derived cortical neurons differentiated from every ASD individual, taking into account individual variability in genetics and pathophysiology.

Despite the significance of SOCE in cellular signaling, it has been challenging to monitor neuronal SOCE in primary neurons<sup>26, 33</sup>. SOCE is very weak in hippocampal neurons<sup>33</sup>, so neuronal SOCE has remained controversial to exist<sup>26</sup>. We took advantages of hPSC-derived cortical neurons to monitor neuronal SOCE during development over one time point. We show that neuronal SOCE activity becomes stronger and significant in

251 mature hPSC-derived cortical neurons as a neuronal SOCE model system, and TRPC6 is involved in SOCE  
252 pathway.

253 TRPC6 has high selectivity for  $\text{Ca}^{2+}$  relative to  $\text{Na}^{+}$  and contributes to SOCE upon ER calcium store depletion<sup>34</sup>,  
254 <sup>35, 36, 37</sup>. Disruption of the TRPC6 gene may contribute to the ASD phenotype<sup>19</sup> and TRPC6 loss-of-function  
255 mutations result in hyperactivity in *Drosophila*<sup>21</sup>. TRPC channels including TRPC6 can be therapeutic targets for  
256 intervention of ASD. Therefore, our TRPC6 KO hPSC-derived cortical neurons provide a platform to screen  
257 therapeutics that rescue SOCE and reverse hyperexcitability. It remains a topic of further study if TRPC6 and  
258 TRPC agonists can rescue SOCE and reverse hyperactive phenotype as ASD therapeutics.

## 259 **Methods**

### 261 **Reagents**

262 Fura-2 pentaacetoxymethyl ester (fura-2/AM) was from Thermo Fisher Scientific (Waltham, MA, USA).

### 264 **CRISPR/Cas9 editing and PSCs maintenance**

265 The hPSC lines used in this study is CRTD5<sup>38</sup> generated from BJ fibroblasts (CRL-2522, ATCC). Cells were  
266 cultured and maintained on Matrigel-coated (BD bioscience, cat# 354277) plates in mTeSR1 medium (STEM  
267 CELL technologies, cat# #85850) in a humidified incubator at 37°C and 5% CO<sub>2</sub>. For editing, the guide RNA  
268 (gRNA) sequence targeting the first exon of TRPC6 was selected using CRISPR-Cas9 guide RNA design tool  
269 (Intergrated DNA technologies). Single guide RNA (sgRNA) was synthesized using EnGen sgRNA Synthesis  
270 Kit (NEB, E3322) according to the manufacturer's instructions. Nucleofection was carried out using the Amaxa  
271 nucleofection system (P3 primarycell 4D-nucleofector kit, Cat#V4XP-3032) according to the manufacturer's  
272 instructions. Briefly, RNP complex were generated by mixing 1 µg of sgRNA with 2 µM of EnGen SpyCas9 NLS  
273 (NEB, M0646) at room temperature for 15-20 min. 2.5-3 x 10<sup>5</sup> hPSCs were electroporated using CB150  
274 nucleofection program and plated onto Matrigel-coated plates. After 48 hr, the cells were diluted and plated as a  
275 single cell on Matrigel-coated plates for 10-15 days to make colonies. Genomic DNA (gDNA) was extracted  
276 using quick extract genomic DNA extraction buffer (epicenter). The region of TRPC6 targeted by sgRNA was  
277 amplified with specific primers (Forward: TGTTGACATAGTAACTCTTCAGCTCCGTCTCCCTTGC,  
278 Reverse: GCTGCCTTGCTACGGCTACTACCCCT) and sequenced using PCR-Master mix (Thermo Fisher  
279 Scientific).

### 281 **Stem cell differentiation into cortical neurons**

282 hPSCs were differentiated into cortical neurons following previously published protocol<sup>23</sup>, with minor  
283 modifications. To initiate differentiation, hPSC colonies were dissociated into single cells using TrypLE (Thermo  
284 Fischer Scientific) and plated onto Matrigel-coated (BD Biosciences) plates in mTeSR1 medium (Stem cell  
285 Technologies, Vancouver) containing 10 µM Y-276321 (ROCK inhibitor). Next day, the cells were 90-100%  
286 confluent and differentiation was initiated by changing medium to Neurobasal medium (DMEM/F12, Neurobasal,  
287 1X B-27 minus vitamin A, 1X N2 supplement, 1X L-Glutamine, 1X Non-essential amino acids (NEAA), 50 µM  
288 β-mercapto-ethanol, 0.2X Penicillin/streptomycin) supplemented with 10 µM SB431542 and 2 µM Dorsomorphin  
289 for 12 days. At day 10, the cells were split using TrypLE and plated onto Matrigel-coated plates in neurobasal  
290 media containing 5 µM Rock inhibitor. For neural proliferation (days 14-18), the neurobasal media was

291 supplemented with 20 ng/ml bFGF. At day 20, NPCs were cryopreserved or plated for maturation onto Matrigel-  
292 coated plates in neurobasal media supplemented with 10 ng/ml BDNF, 10 ng/ml GDNF, 2 µg/ml insulin, 20 µM  
293 dibutyryl-cyclic AMP (db-cAMP, Sigma), and 200 µM Ascorbic acid (AA, Sigma). At day 28, the cells were  
294 plated for experiment at a density of 50,000 cells/cm<sup>2</sup> onto 100 µg/ml poly-L-ornithine (PO, Sigma) and 20µg/ml  
295 laminin-coated plates and media was changed every 2-3 days. The cells were matured for 6-8 weeks.

## 297 **Immunostaining**

298 Cells were washed with 1X PBS and fixed with 4% paraformaldehyde for 15 min at room temperature. The fixed  
299 cells were washed three times with PBS, treated with 0.2 % Triton X-100 (Sigma-Aldrich) in PBS for 30 min and  
300 blocked in PBST (PBS with 0.2% tween-20) containing 3% bovine serum albumin (BSA) for 2-3 hr. The cells  
301 were incubated with primary antibodies overnight at 4°C. Primary antibodies consisted of SOX2 (Rabbit, 1:200,  
302 Invitrogen: MA1-014), FOXG1 (Rabbit, 1:200, Abcam: ab18259), OTX2 (Goat, 1:300, R&D: AF1979), Nestin  
303 (Mouse, 1:100, Invitrogen: MA1110, MAP2 (chicken, 1:500, Abcam: ab5392), MAP2 (Mouse, 1:500, Invitrogen:  
304 13-1500), beta tubulin III (Mouse, 1:300, MAB1637), TBR2 (Rabbit,1:300, Cell signaling: 66325), CTIP2  
305 (Rabbit, 1:200, Cell signaling:), BRN2 (Rabbit, 1:200, Cell signaling:12137), GFAP (Chicken, 1:400, Abcam:  
306 ab4674), and SATB2 (Rabbit, 1:200, Invitrogen:PA5-83092). Next day, the cells were washed three times with  
307 PBST at 10 min intervals and incubated with the secondary antibodies diluted 1:1000 in PBST containing 3%  
308 BSA for 1 hr at room temperature. Secondary antibodies were conjugated with Alexa Flour 488, Alexa Flour 555,  
309 and Alexa Flour 647 dyes (all Thermo Fischer Scientific). Nuclei were stained with DAPI (Thermo Fischer  
310 Scientific) for 5 min. Cells were washed three times with PBS and imaged using the inverted fluorescence  
311 microscope (Olympus IX 53).

## 313 **RNA extraction, Quantitative PCR, and library preparation**

314 The cells were lysed in TRIzol (Thermo Fischer Scientific) and the total RNA was extracted with Direct-zol RNA  
315 extraction kit (Zymo Research) following the manufacturer's instructions. Complementary DNA was synthesized  
316 from 500 ng of RNA using RevertAid First Strand cDNA Synthesis kit (Thermo Fischer Scientific). Quantitative  
317 PCR (qPCR) was performed using Syber Green PCR Master Mix (Applied biosystems) with the primers listed in  
318 **Supplementary Table 2**. For library preparation, total RNA with a RNA integrity number (RIN) above 8 was  
319 used as input using TruSeq Stranded mRNA kit (Cat #: 20020594) from Illumina following the manufacturer's  
320 protocol. Briefly, from 500 ng of total RNA, mRNA molecules were purified using poly-T oligo attached  
321 magnetic beads and then mRNA was fragmented. cDNA was generated from the cleaved RNA fragments using  
322 random priming during first and second strand synthesis. Barcoded DNA adapters was ligated to both ends of

DNA, and then amplified. The quality of library generated was checked on an Agilent 2100 Bioanalyzer system and quantified using a Qubit system. Libraries that pass quality control was pooled, clustered on a cBot platform, and sequenced on an Illumina HiSeq 4000 at a minimum of 20 million paired end reads (2x75 bp) per sample.

### RNA-Seq data analysis

Starting with the FASTQ files, trimming, aligning, and transcript quantification were performed within the Galaxy platform<sup>39</sup>. The paired-end reads were trimmed with default parameter settings using Cutadapt. Alignment of the reads to reference genome GRCh38/hg38 was carried out using HiSAT2<sup>40</sup>. Transcript counting was performed with featureCounts<sup>41</sup>. The count matrix was then normalized and differential expression analysis was performed with the R-library EdgeR<sup>42</sup>. *P*-values were adjusted with the Benjamini–Hochberg procedure, which controlled the false discovery rate (FDR). Genes with adjusted *p* values < 0.05 and fold changes > 1.5 were considered to be differentially expressed. The volcano plot and heatmap were created using the EnhancedVolcano and Pheatmap R-libraries, respectively. The heatmap was z-score scaled column wise; a z-score normalization was performed on the normalized read counts across samples for each gene. Z-scores were computed to plot a heatmap on a gene-by-gene basis by subtracting the mean and then dividing by the standard deviation. Gene Ontology (GO) enrichment and KEGG pathway analysis were performed using the Over-Representation Analysis (ORA) functions of the clusterProfiler 4.0 R-library<sup>43</sup>. Pathview graphs of differentially expressed genes on KEGG pathways was performed using the Pathview R-library<sup>44</sup>.

### Electrophysiology

The action potentials were recorded using the whole-cell patch-clamp technique using an EPC-10 USB amplifier (HEKA Elektronik, Lambrecht/Pfalz, Germany). Data acquisition, voltage control, and analysis were accomplished using software (HEKA Patchmaster). Neurons were placed in the chamber and perfused with the normal Tyrode's bath solution (mM): 143 NaCl, 5.4 KCl, 0.33 NaH<sub>2</sub>PO<sub>4</sub>, 0.5 MgCl<sub>2</sub>, 5 HEPES, 2 CaCl<sub>2</sub>, and 11 glucose; pH 7.4 adjusted with NaOH. Patch pipettes were pulled from borosilicate capillary tubes (A-M systems, WA, USA) using a puller PC-10 (Narishige, Tokyo, Japan) and filled with an internal solution (mM): 130 K-gluconate, 3 KCl, 2 MgCl<sub>2</sub>, 10 HEPES, 5 Na<sub>2</sub>ATP, 0.5 Na<sub>2</sub>GTP, 0.2 EGTA; pH 7.3 adjusted with KOH. The resistance of patch pipettes was 3~5 MΩ. Action potentials were generated by a series of current steps from -20 to +60 pA for 500 ms in a current-clamp mode. Whole-cell currents were measured by a series of 20 mV voltage steps from -120 to +60 mV for 1 sec in a voltage-clamp mode. Signals were low-pass filtered with a cut-off frequency of 5 kHz and sampled at 10 kHz.

### 355 **Multi-well microelectrode array (MEA) analysis.**

356 48-well MEA plates were coated with poly-L-ornithine and laminin for neuronal differentiation as described  
357 before. NPCs (15,000 cells/well) were plated in the center of the well. Extracellular recordings were carried out  
358 using Axion's Maestro multi-well 768 electrode recording platform in combination with Axion 48-well MEA  
359 plates (Axion Biosystems). Each well contains a 4×4 16 channel electrode array with four reference electrodes.  
360 Extracellular voltage recordings were collected at a sampling rate of 12.5 kHz per channel. A band-pass filter  
361 (200 Hz to 3 kHz cut-off frequencies) was applied with a variable threshold spike detector at ±6 standard  
362 deviations of the root mean square (RMS) of the background noise.

363 Recordings were performed before media change or two days after media change. During recording, the MEA  
364 plate was maintained at 37°C and 5% CO<sub>2</sub>. MEA data analysis was performed using the Axion Biosystems Neural  
365 Metric Tool (Axion Biosystems). An electrode was considered active at a threshold of 3 spikes/min. Network  
366 Bursts was defined as at least 5 consecutive spikes across multiple electrode with interspike intervals (ISI) of less  
367 than 100 ms and a minimum of 25% electrodes.

### 369 **Calcium imaging**

370 The neurons on the coverslip were loaded with 3 μM Fura-2AM (Thermo Fisher Scientific) for 30 min at room  
371 temperature. Calcium imaging experiments were carried out using a monochromator-based spectrofluorometric  
372 system (Photon Technology International, Lawrenceville, NJ) with Evolve 512 camera (Teledyne Photometrics,  
373 AZ, USA). Dual excitation and emission were at 340/380 and 510 nm, respectively. Data acquisition was  
374 accomplished using EasyRatioPro software. Neurons were perfused with the normal Tyrode's bath solution  
375 (mM): 143 NaCl, 5.4 KCl, 0.33 NaH<sub>2</sub>PO<sub>4</sub>, 0.5 MgCl<sub>2</sub>, 5 HEPES, 2 CaCl<sub>2</sub>, and 11 glucose; pH 7.4 adjusted with  
376 NaOH. 50 mM KCl was applied to depolarize the membrane potential to evoke calcium influx through voltage-  
377 gated calcium channels. Regions of interest (ROI) were assigned by highlighting the perimeter of the cell using  
378 the software. Mean fluorescence intensity was recorded within the ROIs. Changes in fluorescence intensity were  
379 analyzed after background subtraction using ImageJ software (National Institutes of Health, Bethesda, MD).

### 381 **Western Blot**

382 Total proteins were extracted with the Laemmle sample buffer (200mM Tris-HCl, pH 6.8, 8% sodium dodecyl  
383 sulfate, 0.4% Bromophenol blue, 20% glycerol, 5% 2-mercaptoethanol) and heated at 95°C for 10 min. Cell lysates  
384 and protein samples were loaded on Bolt™ 4-12% Bis-Tris Plus Precast Protein Gels (Invitrogen  
385 NW04122BOX), and proteins were transferred to nitrocellulose membrane (88018, Thermo Fisher Scientific).  
386 Blots were then blocked with 5% skim milk in TBST for at least 1 hr at room temperature. Immunoblotting was



387 done overnight at 4°C with the following antibodies at the appropriate dilutions: TRPC6 antibody (Abcam  
388 ab228771, 1:1000). The blots were washed the next day and incubated with Goat anti-Rabbit-HRP secondary  
389 antibody (Cat # 31460, Thermo Fisher Scientific, 1:10,000). The Protein bands were subsequently scanned using  
390 the ChemiDoc imaging system (BioRad).

### 391 **Statistical analysis**

392 Data analysis was performed using OriginPro 2019 software (OriginLab Corporation, Northampton, MA, USA)  
393 and GraphPad Prism 9 (GraphPad Software, San Diego, CA, USA). Data are means  $\pm$  standard error of the mean  
394 (S.E.M.). Welch and Brown-Forsythe one-way ANOVA was used to determine any statistically significant  
395 differences between three or more independent groups. Unpaired two-tailed t-test was used to estimate statistical  
396 significance between two groups. Probabilities of  $p < 0.05$  was considered significant.  
397  
398

399 **Figure legend**

400

401 **Figure 1. Characterization of human cortical neurons generated *in-vitro* from pluripotent stem cells. (a)**

402 Schematic of hPSC differentiation into NPCs and mature cortical neurons. The arrows indicate the time point of

403 splitting the cells. **(b)** Immunostaining of control and TRPC6 KO cortical neurons (from two different hPSC

404 clones, C21 and C47) differentiated for 8 weeks. Cortical neuron markers; CTIP2, SATB2, TBR2, and BRN2.

405 MAP2, BTUB; pan-neuronal markers. **(c)** GFAP, a marker for glia. vGLUT1, a marker for glutamatergic

406 excitatory synapses. **(d)** Synaptophysin (Syn), a synaptic vesicle protein. Nuclei are stained with DAPI. **(e)**

407 Validation of TRPC6 protein expression in TRPC6 KO cortical neurons differentiated for 8 weeks. Scale, 100

408  $\mu\text{m}$ .

409

410 **Figure 2. Electrophysiological characterization of hPSC-derived cortical neurons.** (a) DIC image of hPSC-  
411 derived cortical neurons for electrophysiological whole-cell patch-clamp recording after 6 weeks of  
412 differentiation. (b) Whole-cell patch-clamp recording to monitor AP generated by injection of current pulses in a  
413 current clamp mode; no AP, single AP, or multiple and repetitive AP. (c) Distributions of AP generation; no AP,  
414 single AP, or multiple/repetitive AP in hPSC-derived cortical neurons differentiated for 0, 3, 6, and 8 weeks.  
415 Number of cells tested are shown from 3~6 independent differentiation. (d) Na<sup>+</sup> influx is followed by K<sup>+</sup> efflux  
416 in a voltage clamp mode. (e-j) Characterization of calcium influx through VGCCs in hPSC-derived cortical  
417 neurons. (e) Image of Fura-2-loaded hPSC-derived cortical neurons after 6 weeks of differentiation. (f)  
418 Representative traces of intracellular calcium ions (Fura-2 F340/F380 ratio) in neurons stimulated by 50 mM KCl  
419 for 2 min; 0 week (black line) and 8 weeks (red line) of differentiation. (g) Percentage of neurons that evoke  
420 calcium influx by 50 mM KCl. Number of cells tested are shown from 3~4 independent differentiation. (h) Net  
421 changes of calcium increase by 50 mM KCl. Data are means ± SEM from 3~4 independent differentiation. (i,j)  
422 Representative calcium trace of Fura-2 F340/F380 ratio in 8-week old hPSC-derived cortical neurons in the  
423 absence of extracellular calcium ions (i) and in the presence of 2 μM nifedipine (Nif) (j).

424

425 **Figure 3. Downregulation of SOCE in TRPC6 KO hPSC-derived cortical neurons.** (a) Representative  
426 calcium trace of Fura-2 F340/F380 ratio for SOCE responses by TG that depletes ER calcium store and leads to  
427 activation of SOCE; 0 week (black line) and 8 weeks (red line) of differentiation. (b) The net increase of calcium  
428 level by SOCE activation in hPSC-derived cortical neurons differentiated for 0, 3, 6, and 8 weeks. Data are means  
429  $\pm$  SEM and number of cells tested are shown from 5~6 independent differentiation. (c) Representative calcium  
430 trace of Fura-2 F340/F380 ratio in ionomycin-treated cortical neurons. (d) The net increase of calcium level by  
431 ionomycin treatment as a control. Data are means  $\pm$  SEM and number of cells tested are shown from 5~6  
432 independent differentiation. Welch and Brown-Forsythe one-way ANOVA was used in **b,d**. \*,  $p < 0.05$ . \*\*,  $p <$   
433  $0.01$ . ns, not significant. (e,f) Representative calcium trace of SOCE in 8-week old cortical neurons in the presence  
434 of 10  $\mu$ M BTP2, a selective TRPC inhibitor, or 5  $\mu$ M gadolinium ( $Gd^{3+}$ ), a non-selective cation channel blocker.  
435 (g,h) Calcium increase in ionomycin-treated cortical neurons in the presence of BTP2 or  $Gd^{3+}$ . Data in **f,h** are  
436 means  $\pm$  SEM and number of cells tested are shown from 2 independent differentiation. (i) TRPC6 expression in  
437 hPSC-derived cortical neurons differentiated for 0, 3, 4, and 8 weeks. (j-l) TRPC6 KO reduces SOCE.  
438 Representative calcium trace of Fura-2 F340/F380 ratio (left) and quantification of net calcium increase (right) in  
439 hPSC-derived (C21 hPSC line) cortical neurons differentiated for 3 (j), 6 (k), and 8 (l) weeks. Data in **j-l** are  
440 means  $\pm$  SEM and number of cells tested are shown in parentheses from 2 independent differentiation and  
441 unpaired two-tailed t-test was used. \*\*,  $p < 0.01$ . \*\*\*\*,  $p < 0.0001$ .

443 **Figure 4. Hyperexcitability in TRPC6 KO hPSC-derived cortical neurons.** (a,b) Representative multiple AP  
444 of wild-type and TRPC6 KO neurons differentiated for 6 weeks (C21 hPSC line). APs were generated by injection  
445 of current pulses in a current clamp mode. (c) Distributions of AP generation of either no AP, single AP, or  
446 multiple/repetitive AP and (d) frequency of APs in wild-type and TRPC6 KO hPSC-derived cortical neurons  
447 differentiated for 6 weeks and 8 weeks (e,f). (g-p) Monitoring neuronal activity and neural network using  
448 microelectrode array (MEA). (g) Raster plots of hPSC-derived cortical neurons at 8 weeks of differentiation in  
449 the presence of 1  $\mu$ M AP5 (5 min) and recovery after washout. Quantification of weighted mean firing rate (Hz)  
450 (h), synchrony index (i), and network burst frequency of neural network (j). Data are means  $\pm$  SEM (n = 5) from  
451 2 independent differentiation. (k-p) TRPC6 KO increases neuronal activity and neural network formation (C21  
452 hPSC line). Quantification of weighted mean firing rate (Hz), synchrony index of neural network from wild-type  
453 and TRPC6 KO hPSC-derived cortical neurons differentiated for 3 (k,l), 6 (m,n), and 8 (o,p) weeks. Data in  
454 **d,f,k-p** are means  $\pm$  SEM and number of cells tested are shown in parentheses from 2 independent differentiation  
455 and unpaired two-tailed t-test was used. \*,  $p < 0.05$ . \*\*,  $p < 0.01$ . \*\*\*,  $p < 0.001$ . \*\*\*\*,  $p < 0.0001$ .

457 **Figure 5. Transcriptome profiling of TRPC6 KO hPSC-derived cortical neurons.** (a) Volcano plot of the  
458 differentially expressed (DE) mRNAs between control and TRPC6 KO hPSC-derived cortical neurons at 8 weeks  
459 of differentiation; upregulated (light red) and downregulated (light blue) transcripts. Total 27,814 mRNA  
460 transcripts were tested. Color indicates significantly dysregulated transcripts with  $< 0.05$   $p$ -value and 1.5 fold  
461 change (FC) cut-off. (b) Heatmap of hierarchical clustering analysis of DE mRNAs representing the upregulation  
462 and downregulation of transcripts from three different conditions; control hPSC-derived cortical neurons and  
463 TRPC6 KO hPSC-derived cortical neurons from two different hPSC clones (C21 and C47) at 8 weeks of  
464 differentiation. Four biological replicates and independent differentiation were analyzed (1.5 FC,  $p < 0.05$ ). Red  
465 color, upregulated mRNAs; blue color, downregulated mRNAs. Expression data have been standardized as  $z$ -  
466 scores for each mRNA. (c) GO enrichment analysis for biological process of upregulated genes in TRPC6 KO  
467 hPSC-derived cortical neurons. The GO cut-off criteria included  $q$  (adjusted  $p$  value)  $< 0.000001$ .

468

469 **Supplementary Figure legend**

470

471 **Supplementary Figure 1. TRPC6 KO in CRTD5 hPSC lines using CRISPR/Cas9.** (a) Genomic DNA  
472 sequence of TRPC6 intronic and exonic sequence spanning the start codon (green) and guide RNA targeting  
473 sequence. (b,c) Genomic DNA sequencing analysis of KO clones. PCR primers were designed to amplify the  
474 gRNA-targeted region. Sequence of KO clone 21 (65 bp deletion), clone 47 (49 bp deletion), and wild-type  
475 TRPC6. KO clones were identified by Sanger sequencing. (d) PCR products from the intact DNA sequence, 534  
476 bp.

480 **Supplementary Figure 2.** (a) Bright field images of control (Ctrl) and KO clones (C21 and C47). (b) Expression  
481 of pluripotency markers; OCT4, NANOG, and SOX2. TRPC6 mRNA in KO clones. (c) Immunostaining of  
482 control NPCs and TRPC6 KO NPCs derived from two different hPSC clones (C21 and C47) with antibodies  
483 against SOX2, OTX2, FOXG1, and Nestin (Nes). Nuclei are stained with DAPI. Scale, 200  $\mu$ m.

484

485



486 **Supplementary Figure 3.** Whole-cell currents in hPSC-derived cortical neurons differentiated for 6 weeks from  
487 NPCs were measured using whole-cell patch-clamp in a voltage-clamp mode. Ionic current is generated by a  
488 series of 20 mV voltage steps from  $-120$  to  $+60$  mV for 1 sec in a voltage-clamp mode.  $\text{Na}^+$  channels are rapidly  
489 inactivated, whereas  $\text{K}^+$  channels remain open upon membrane depolarization.

490

491

492

493 **Supplementary Figure 4. (a)** Reduced SOCE in different hPSC line (C47)-derived TRPC6 KO cortical neurons.  
494 Quantification of net calcium increase in hPSC-derived cortical neurons (C47 hPSC line) differentiated for 8  
495 weeks. **(b)** Representative multiple AP of wild-type and different hPSC line (C47)-derived TRPC6 KO neurons  
496 differentiated for 6 weeks. **(c)** Distributions of AP generation of either no AP, single AP, or multiple/repetitive  
497 AP and **(d)** frequency of APs in wild-type and TRPC6 KO hPSC-derived cortical neurons (C47 hPSC line). Data  
498 in **a-c** are means  $\pm$  SEM and number of cells tested are shown in parentheses from 2 independent differentiation  
499 and unpaired two-tailed t-test was used. \*,  $p < 0.05$ . \*\*\*,  $p < 0.001$ .

500

501

502 **Supplementary Figure 5. (a)** Raster plots showing electrical activity of hPSC-derived cortical neurons at 8 weeks  
503 of differentiation in the presence of 1  $\mu$ M TTX (5 min) and recovery after washout. Each row of spikes represents  
504 an electrode; 16 electrodes in a single well. Vertical red rectangles represent events of network bursts of electrical  
505 activity. Quantification of weighted mean firing rate (Hz) **(b)** and synchrony index **(c)**. Data in **b,c** are means  $\pm$   
506 SEM (n = 5) from 2 independent differentiations.

507

508

509 **Supplementary Figure 6.** KEGG Pathway enrichment analysis using clusterProfiler and Pathview. KEGG view  
510 on **(a)** glutamatergic presynaptic neurons, **(b)** GABAergic presynaptic neurons, **(c)** calcium signaling pathway,  
511 and **(d)** synaptic vesicle cycle pathway. Colors in **a-d** correspond to  $\log_2$  FC (fold changes) between control and  
512 TRPC6 KO hPSC-derived cortical neurons. Blue, downregulated; red, upregulated.

513

514

## 515 References

516

517 1. *Diagnostic and statistical manual of mental disorders: DSM-5™, 5th ed.* American Psychiatric  
518 Publishing, Inc. (2013).

519

520 2. State MW, Levitt P. The conundrums of understanding genetic risks for autism spectrum disorders. *Nat*  
521 *Neurosci* **14**, 1499-1506 (2011).

522

523 3. Carter MT, Scherer SW. Autism spectrum disorder in the genetics clinic: a review. *Clin Genet* **83**, 399-  
524 407 (2013).

525

526 4. Fernandez BA, Scherer SW. Syndromic autism spectrum disorders: moving from a clinically defined to a  
527 molecularly defined approach. *Dialogues Clin Neurosci* **19**, 353-371 (2017).

528

529 5. Sullivan JM, De Rubeis S, Schaefer A. Convergence of spectrums: neuronal gene network states in autism  
530 spectrum disorder. *Curr Opin Neurobiol* **59**, 102-111 (2019).

531

532 6. Nguyen RL, Medvedeva YV, Ayyagari TE, Schmunk G, Gargus JJ. Intracellular calcium dysregulation  
533 in autism spectrum disorder: An analysis of converging organelle signaling pathways. *Biochim Biophys*  
534 *Acta Mol Cell Res* **1865**, 1718-1732 (2018).

535

536 7. Berridge MJ, Bootman MD, Roderick HL. Calcium signalling: dynamics, homeostasis and remodelling.  
537 *Nat Rev Mol Cell Biol* **4**, 517-529 (2003).

538

539 8. Berridge MJ. Elementary and global aspects of calcium signalling. *J Exp Biol* **200**, 315-319 (1997).

540

541 9. Neher E, Sakaba T. Multiple roles of calcium ions in the regulation of neurotransmitter release. *Neuron*  
542 **59**, 861-872 (2008).

543

544 10. Taylor CW, Machaca K. IP<sub>3</sub> receptors and store-operated Ca<sup>2+</sup> entry: a license to fill. *Curr Opin Cell*  
545 *Biol* **57**, 1-7 (2019).

546

547 11. Putney JW, Jr. A model for receptor-regulated calcium entry. *Cell Calcium* **7**, 1-12 (1986).

548

549 12. Wegierski T, Kuznicki J. Neuronal calcium signaling via store-operated channels in health and disease.  
550 *Cell Calcium* **74**, 102-111 (2018).

551

552 13. Liu H, Hughes JD, Rollins S, Chen B, Perkins E. Calcium entry via ORAI1 regulates glioblastoma cell  
553 proliferation and apoptosis. *Exp Mol Pathol* **91**, 753-760 (2011).

554

555 14. Courjaret R, Machaca K. STIM and Orai in cellular proliferation and division. *Front Biosci (Elite Ed)* **4**,  
556 331-341 (2012).

557

558 15. Zhang SL, *et al.* STIM1 is a Ca<sup>2+</sup> sensor that activates CRAC channels and migrates from the Ca<sup>2+</sup> store  
559 to the plasma membrane. *Nature* **437**, 902-905 (2005).

560

- 561 16. Wissenbach U, Philipp SE, Gross SA, Cavalie A, Flockerzi V. Primary structure, chromosomal  
562 localization and expression in immune cells of the murine ORAI and STIM genes. *Cell Calcium* **42**, 439-  
563 446 (2007).  
564
- 565 17. Secondo A, Bagetta G, Amantea D. On the Role of Store-Operated Calcium Entry in Acute and Chronic  
566 Neurodegenerative Diseases. *Front Mol Neurosci* **11**, 87 (2018).  
567
- 568 18. Lopez JJ, Jardin I, Sanchez-Collado J, Salido GM, Smani T, Rosado JA. TRPC Channels in the SOCE  
569 Scenario. *Cells* **9**, (2020).  
570
- 571 19. Griesi-Oliveira K, *et al.* Modeling non-syndromic autism and the impact of TRPC6 disruption in human  
572 neurons. *Mol Psychiatry* **20**, 1350-1365 (2015).  
573
- 574 20. Ruzzo EK, *et al.* Inherited and De Novo Genetic Risk for Autism Impacts Shared Networks. *Cell* **178**,  
575 850-866 e826 (2019).  
576
- 577 21. Palacios-Munoz A, *et al.* Mutations in *trpgamma*, the homologue of TRPC6 autism candidate gene, causes  
578 autism-like behavioral deficits in *Drosophila*. *Mol Psychiatry*, (2022).  
579
- 580 22. Takahashi K, *et al.* Induction of pluripotent stem cells from adult human fibroblasts by defined factors.  
581 *Cell* **131**, 861-872 (2007).  
582
- 583 23. Shi Y, Kirwan P, Livesey FJ. Directed differentiation of human pluripotent stem cells to cerebral cortex  
584 neurons and neural networks. *Nat Protoc* **7**, 1836-1846 (2012).  
585
- 586 24. Bargas J, Howe A, Eberwine J, Cao Y, Surmeier DJ. Cellular and molecular characterization of Ca<sup>2+</sup>  
587 currents in acutely isolated, adult rat neostriatal neurons. *J Neurosci* **14**, 6667-6686 (1994).  
588
- 589 25. Vergara R, *et al.* Spontaneous voltage oscillations in striatal projection neurons in a rat corticostriatal  
590 slice. *J Physiol* **553**, 169-182 (2003).  
591
- 592 26. Lu B, Fivaz M. Neuronal SOCE: Myth or Reality? *Trends Cell Biol* **26**, 890-893 (2016).  
593
- 594 27. Wu YL, *et al.* Inhibition of TRPC6 channels ameliorates renal fibrosis and contributes to renal protection  
595 by soluble klotho. *Kidney Int* **91**, 830-841 (2017).  
596
- 597 28. Kinoshita H, *et al.* Inhibition of TRPC6 channel activity contributes to the antihypertrophic effects of  
598 natriuretic peptides-guanylyl cyclase-A signaling in the heart. *Circ Res* **106**, 1849-1860 (2010).  
599
- 600 29. Bourne GW, Trifaro JM. The gadolinium ion: a potent blocker of calcium channels and catecholamine  
601 release from cultured chromaffin cells. *Neuroscience* **7**, 1615-1622 (1982).  
602
- 603 30. Riccio A, *et al.* mRNA distribution analysis of human TRPC family in CNS and peripheral tissues. *Brain*  
604 *Res Mol Brain Res* **109**, 95-104 (2002).  
605
- 606 31. Lugo-Marin J, *et al.* COVID-19 pandemic effects in people with Autism Spectrum Disorder and their  
607 caregivers: Evaluation of social distancing and lockdown impact on mental health and general status. *Res*  
608 *Autism Spectr Disord* **83**, 101757 (2021).  
609

- 610 32. Hours C, Recasens C, Baleyte JM. ASD and ADHD Comorbidity: What Are We Talking About? *Front*  
611 *Psychiatry* **13**, 837424 (2022).
- 612
- 613 33. Garcia-Alvarez G, *et al.* STIM2 regulates PKA-dependent phosphorylation and trafficking of AMPARs.  
614 *Mol Biol Cell* **26**, 1141-1159 (2015).
- 615
- 616 34. Brechard S, Melchior C, Plancon S, Schenten V, Tschirhart EJ. Store-operated Ca<sup>2+</sup> channels formed by  
617 TRPC1, TRPC6 and Orail and non-store-operated channels formed by TRPC3 are involved in the  
618 regulation of NADPH oxidase in HL-60 granulocytes. *Cell Calcium* **44**, 492-506 (2008).
- 619
- 620 35. Jardin I, Redondo PC, Salido GM, Rosado JA. Phosphatidylinositol 4,5-bisphosphate enhances store-  
621 operated calcium entry through hTRPC6 channel in human platelets. *Biochim Biophys Acta* **1783**, 84-97  
622 (2008).
- 623
- 624 36. Selli C, Erac Y, Kosova B, Tosun M. Post-transcriptional silencing of TRPC1 ion channel gene by RNA  
625 interference upregulates TRPC6 expression and store-operated Ca<sup>2+</sup> entry in A7r5 vascular smooth  
626 muscle cells. *Vascul Pharmacol* **51**, 96-100 (2009).
- 627
- 628 37. Jardin I, Gomez LJ, Salido GM, Rosado JA. Dynamic interaction of hTRPC6 with the Orail-STIM1  
629 complex or hTRPC3 mediates its role in capacitative or non-capacitative Ca(2+) entry pathways. *Biochem*  
630 *J* **420**, 267-276 (2009).
- 631
- 632 38. Kutsche LK, *et al.* Combined Experimental and System-Level Analyses Reveal the Complex Regulatory  
633 Network of miR-124 during Human Neurogenesis. *Cell Syst* **7**, 438-452 e438 (2018).
- 634
- 635 39. Afgan E, *et al.* The Galaxy platform for accessible, reproducible and collaborative biomedical analyses:  
636 2018 update. *Nucleic Acids Res* **46**, W537-W544 (2018).
- 637
- 638 40. Kim D, Langmead B, Salzberg SL. HISAT: a fast spliced aligner with low memory requirements. *Nat*  
639 *Methods* **12**, 357-360 (2015).
- 640
- 641 41. Liao Y, Smyth GK, Shi W. featureCounts: an efficient general purpose program for assigning sequence  
642 reads to genomic features. *Bioinformatics* **30**, 923-930 (2014).
- 643
- 644 42. Robinson MD, McCarthy DJ, Smyth GK. edgeR: a Bioconductor package for differential expression  
645 analysis of digital gene expression data. *Bioinformatics* **26**, 139-140 (2010).
- 646
- 647 43. Wu T, *et al.* clusterProfiler 4.0: A universal enrichment tool for interpreting omics data. *Innovation*  
648 *(Camb)* **2**, 100141 (2021).
- 649
- 650 44. Luo W, Brouwer C. Pathview: an R/Bioconductor package for pathway-based data integration and  
651 visualization. *Bioinformatics* **29**, 1830-1831 (2013).
- 652
- 653

# Figure 1

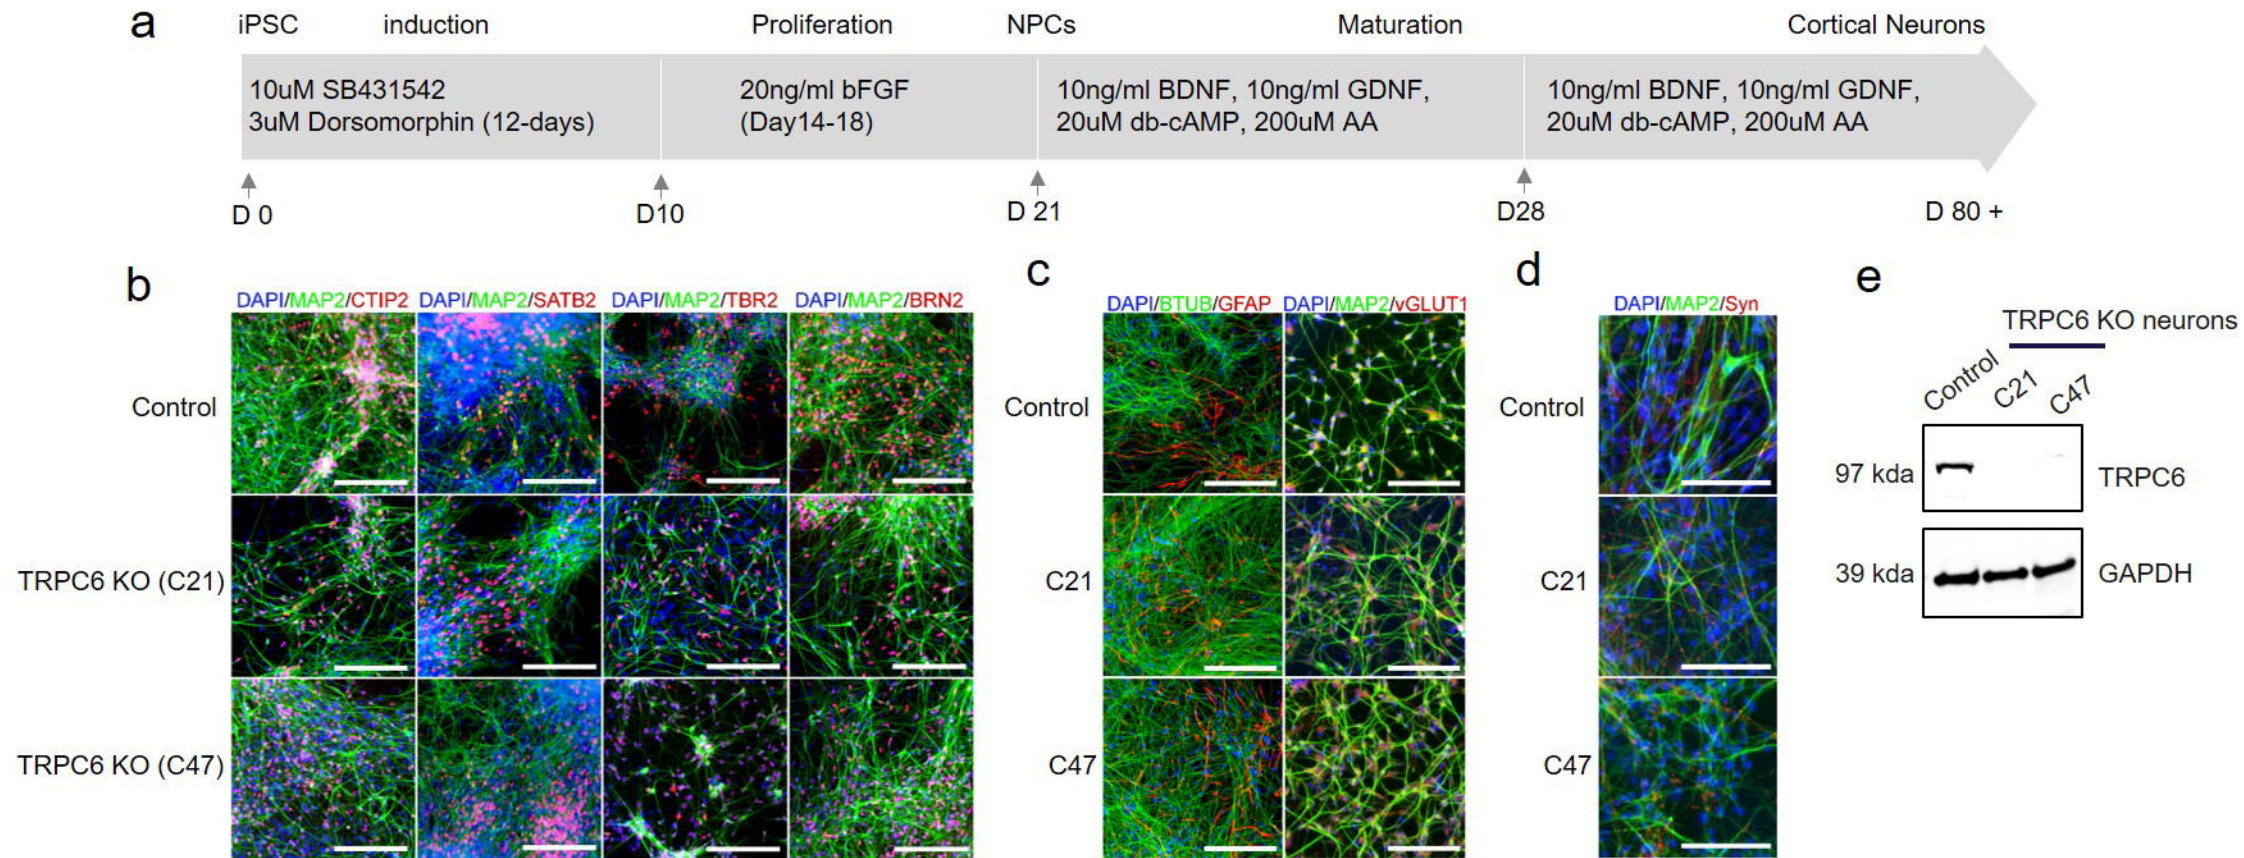



Figure 2

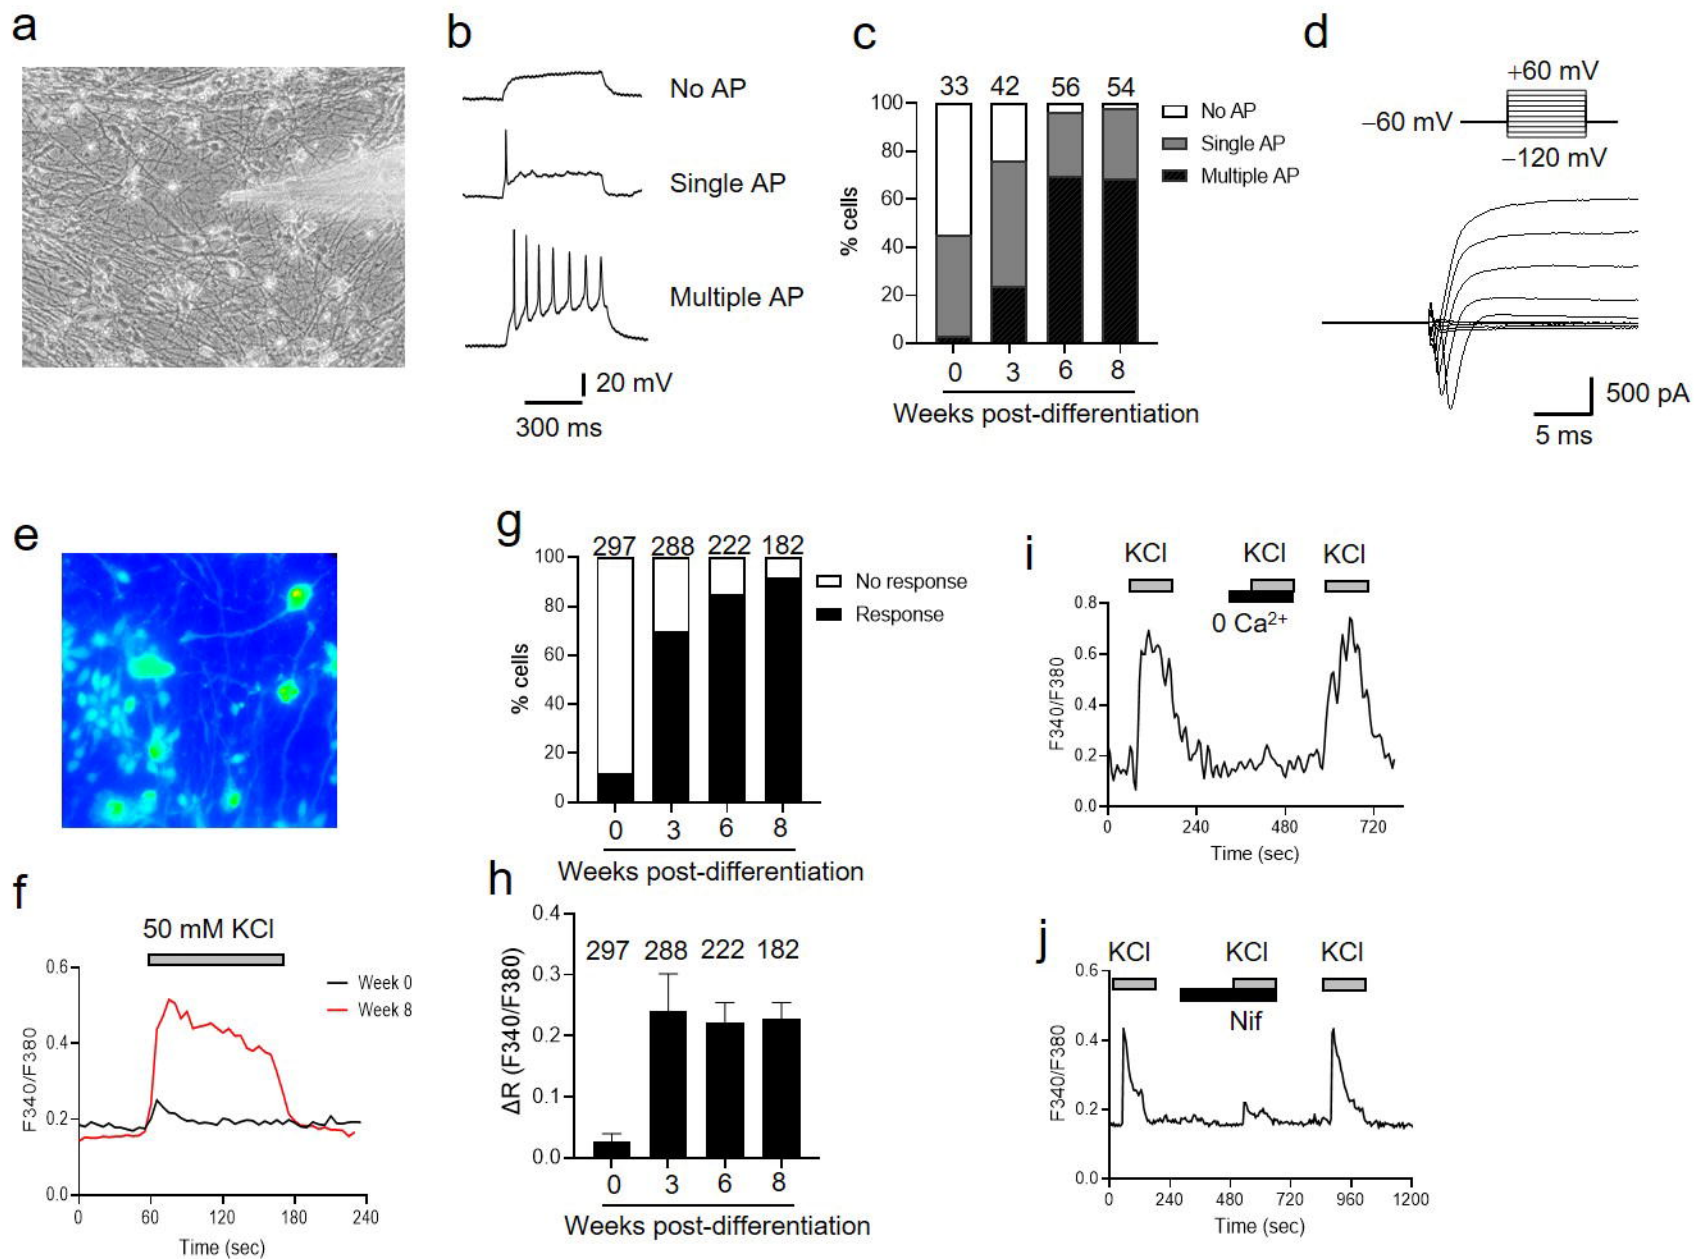

# Figure 3

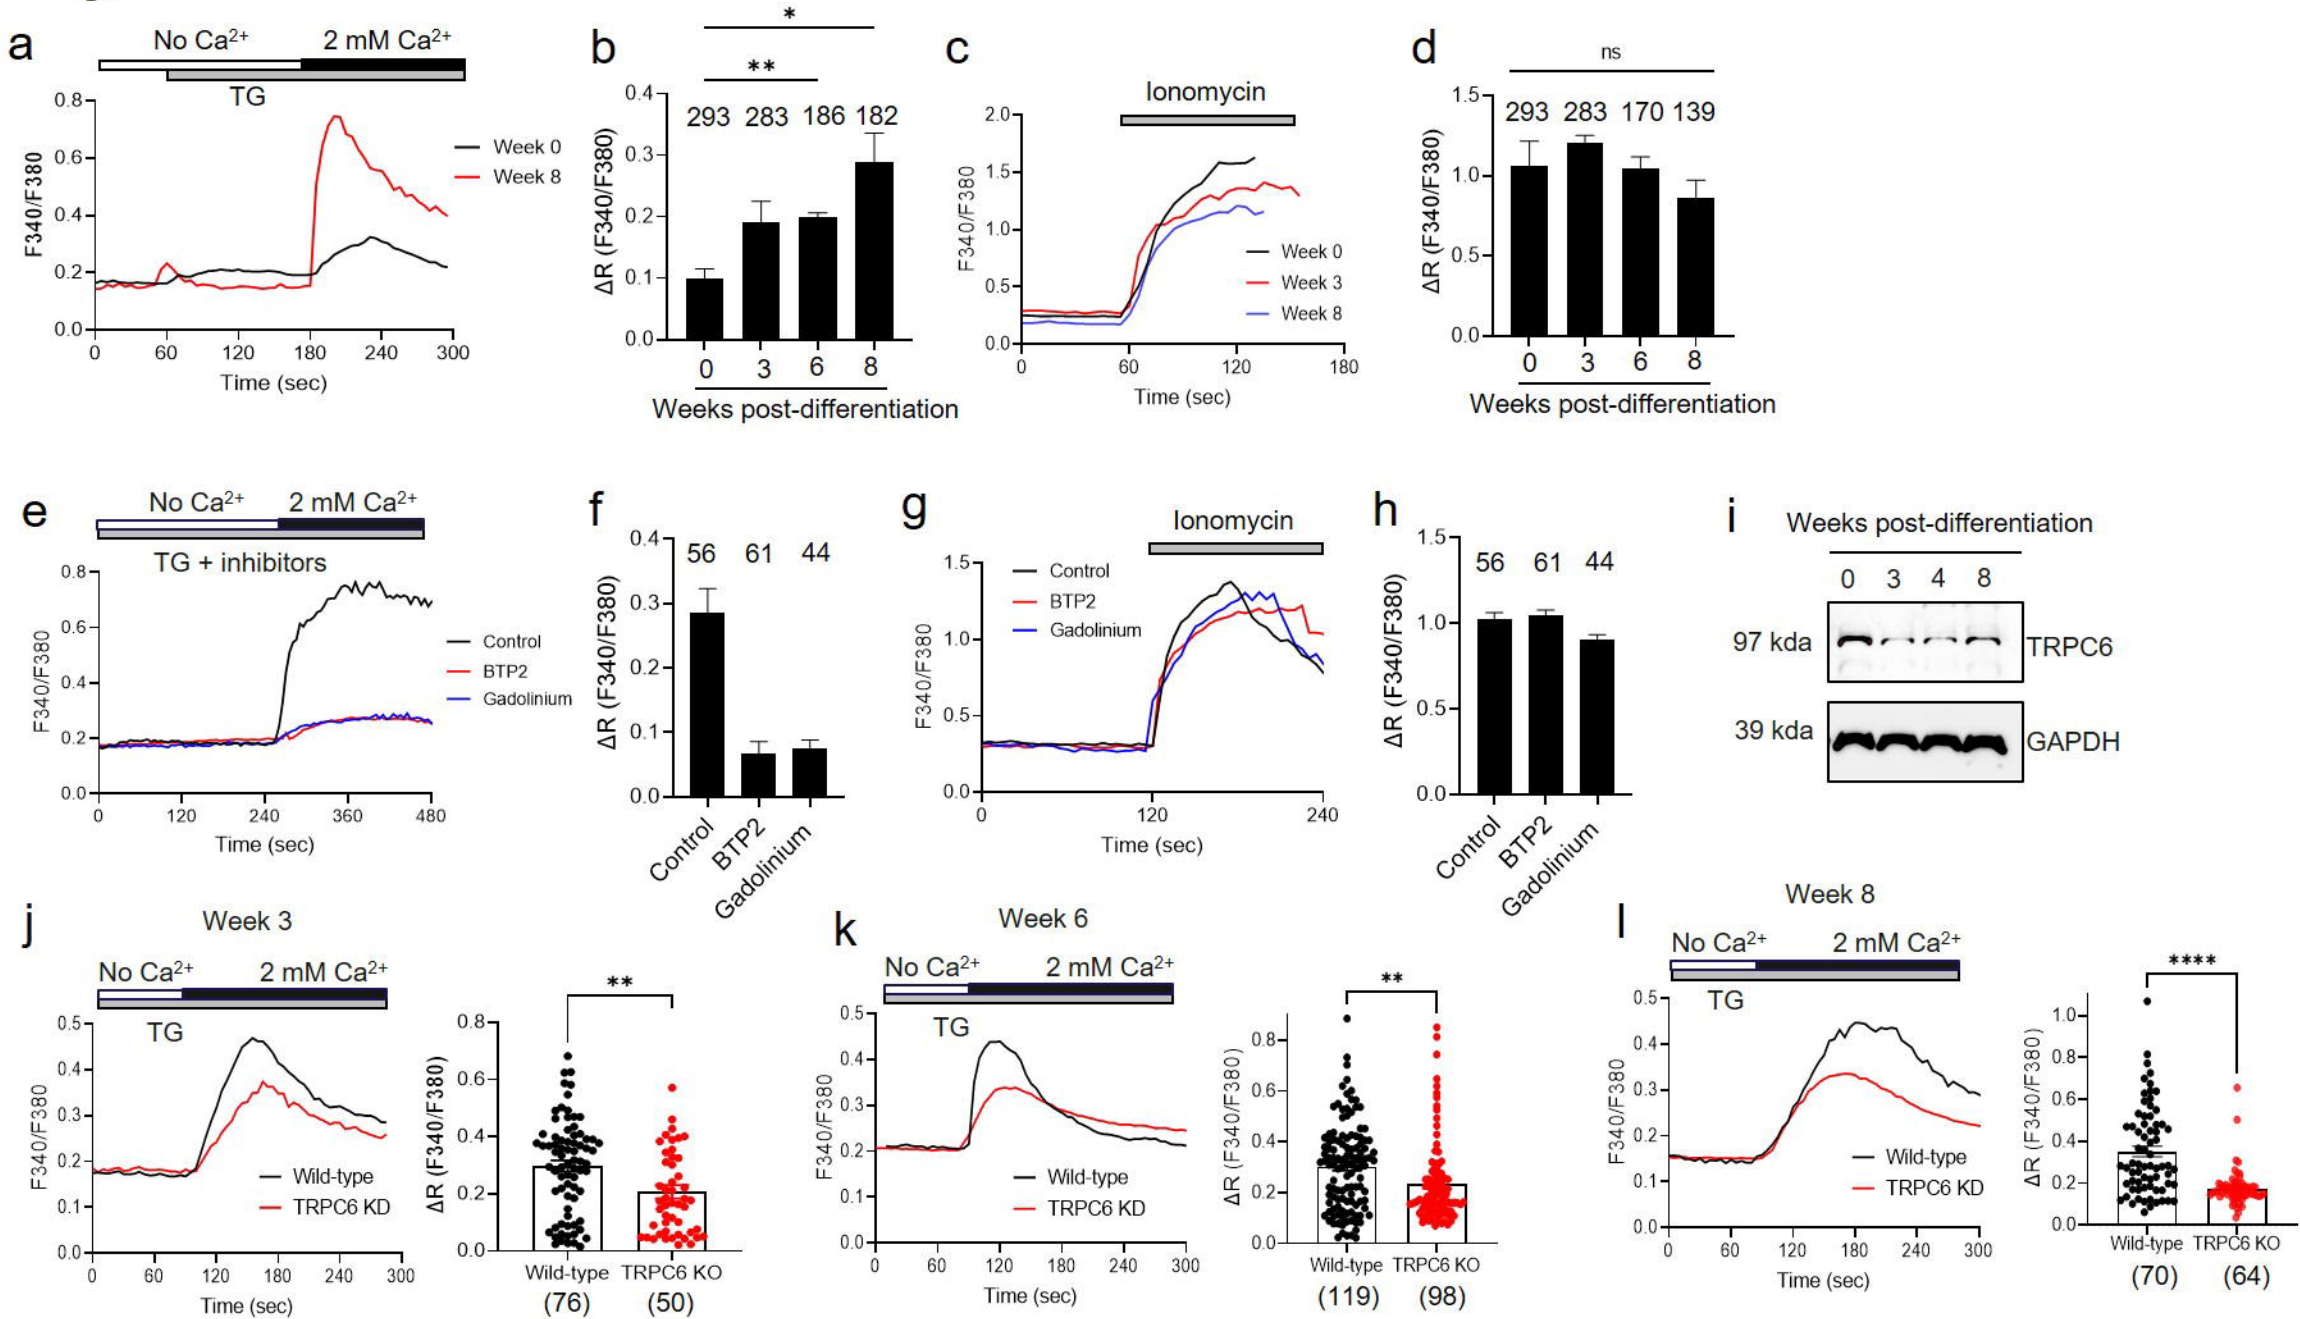

Figure 4

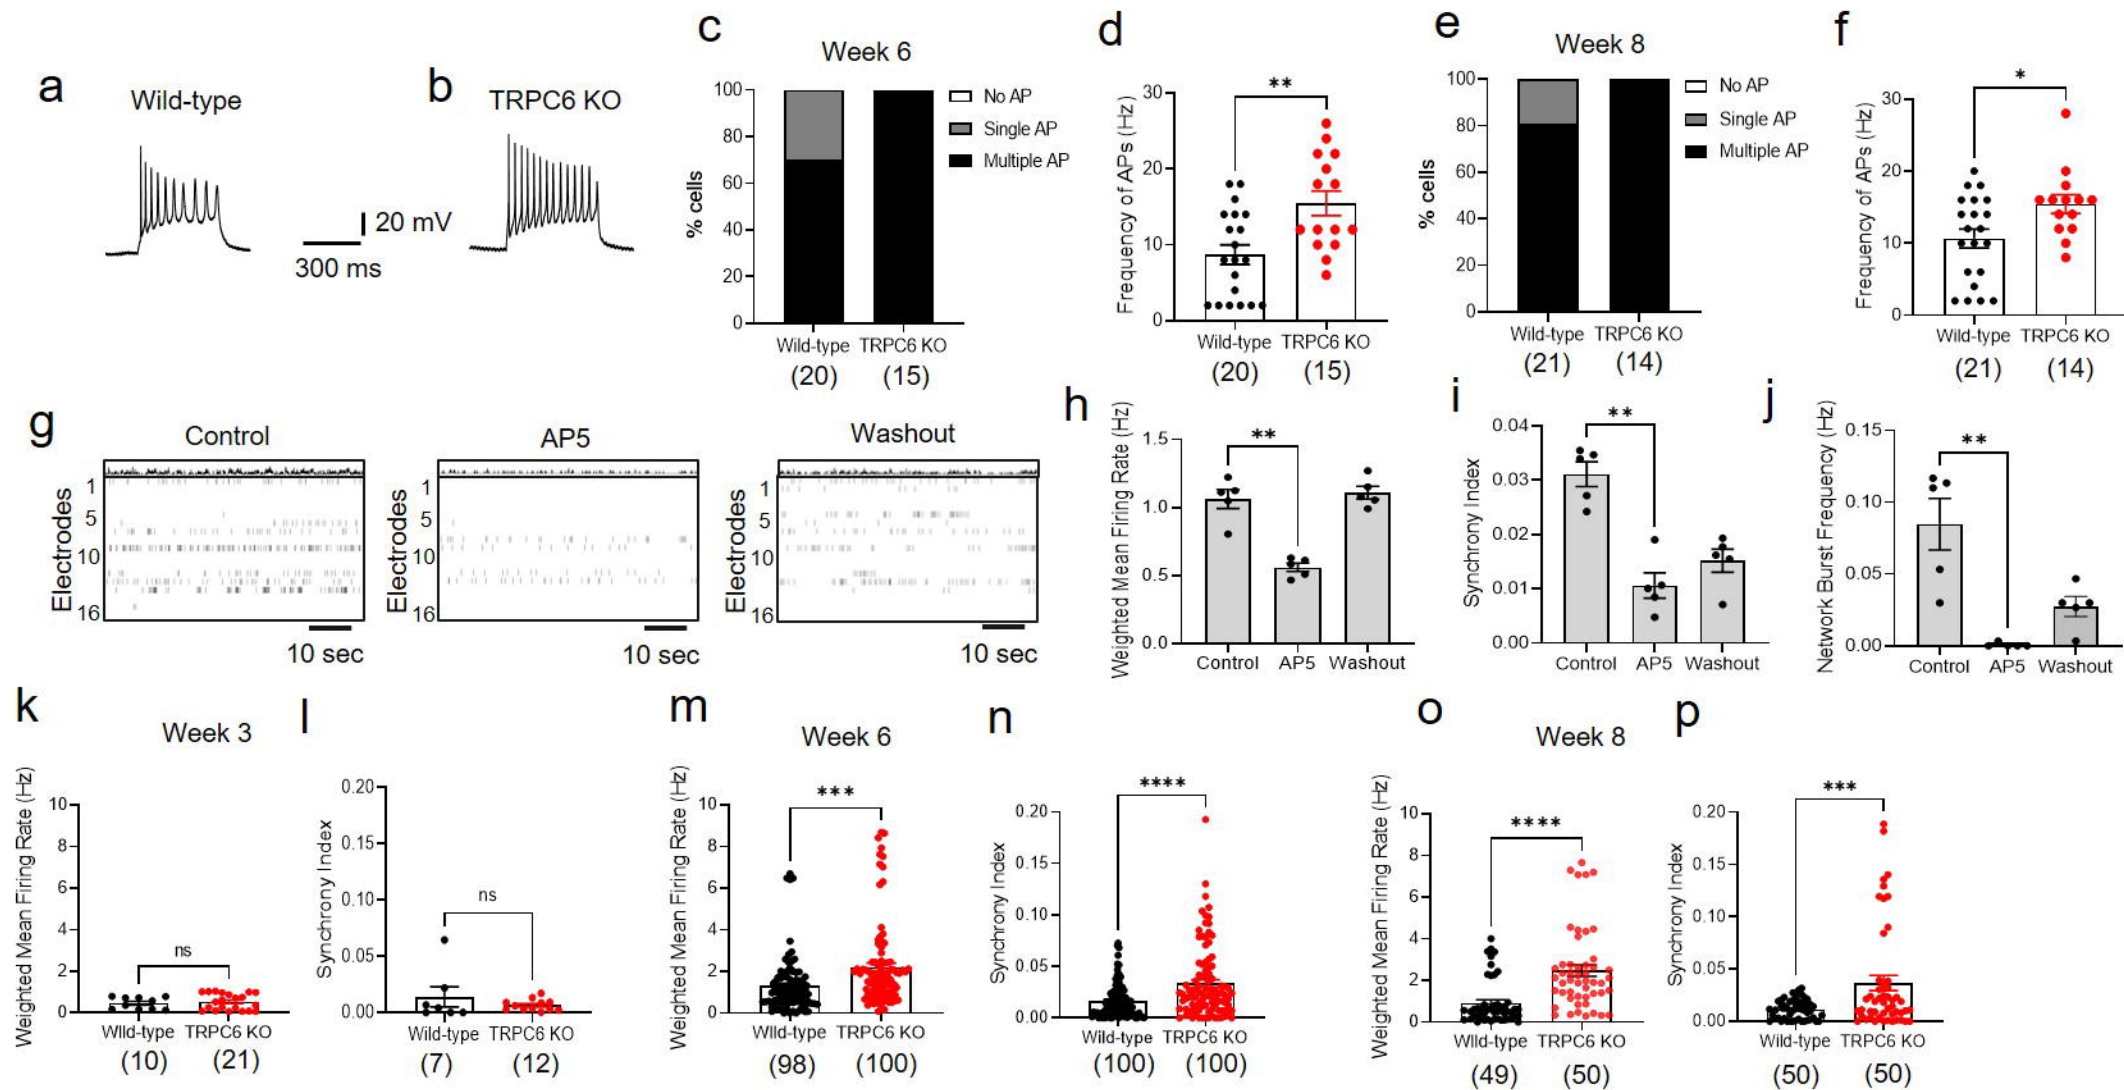

Figure 5

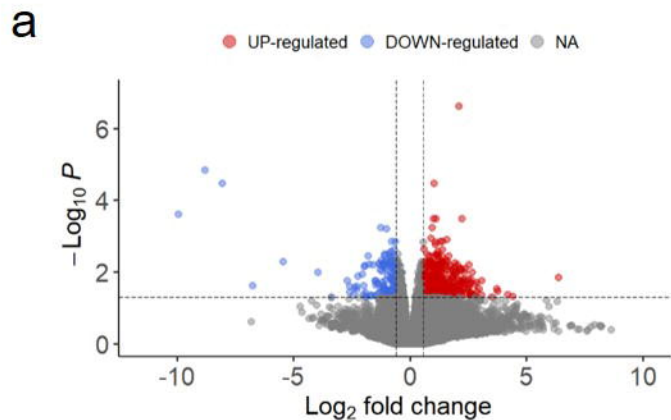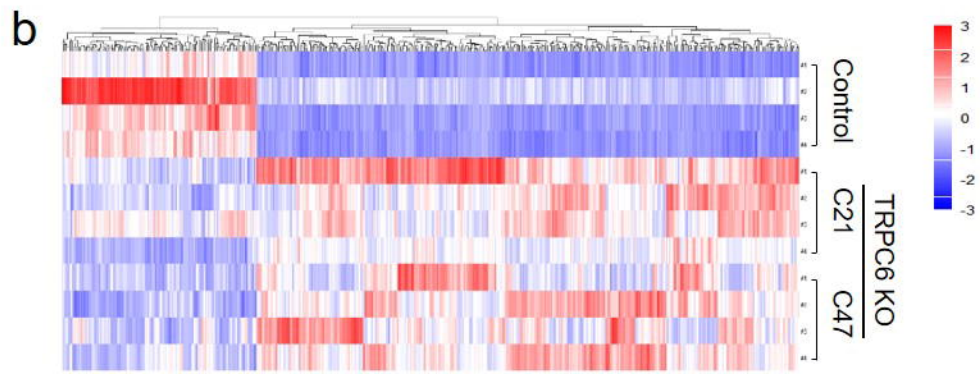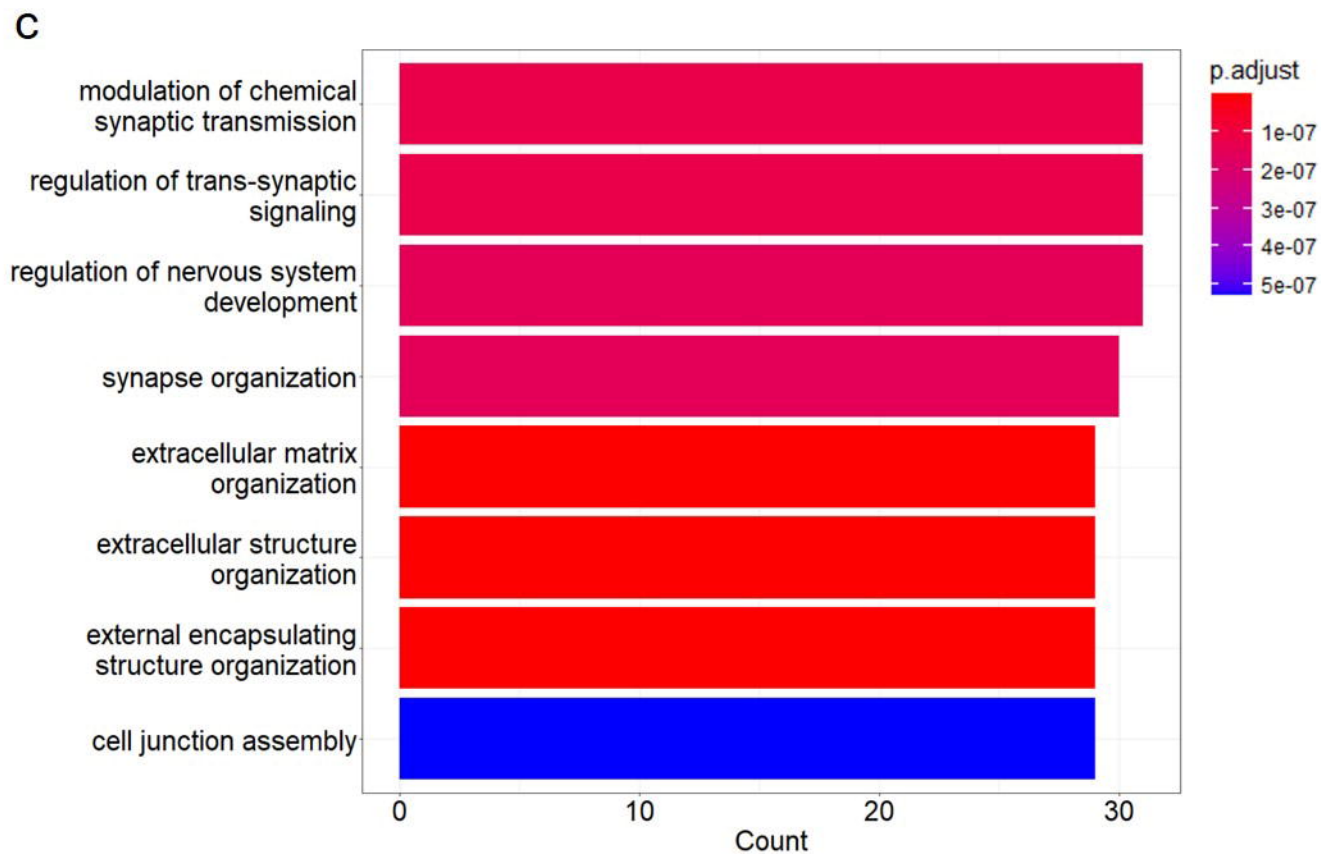

Source: https://www.biorxiv.org/content/10.1101/2022.11.14.516407v1.full.pdf
